# Supplementary material for: Co-delivery of 5-fluorocytosine and cytosine deaminase into glioma cells mediated by an intracellular environment-responsive nanovesicle
Source: Royal Society of Chemistry journal article supplement (doi:10.1039/c4py00291a), 2014-01-01
Supplement: c4py00291a1.pdf [file c4py00291a1.pdf]

## Supporting information

Co-delivery of 5-fluorocytosine and cytosine deaminase into glioma cells mediated by an intracellular environment-responsive nanovesicle

Lu Wang<sup>†</sup>, Yuanyuan Yuan<sup>†</sup>, Shudong Lin, Du Cheng, Xiaoying Wang, Qing Jiang, Xintao Shuai\*

*PCFM Lab of Ministry of Education, School of Chemistry and Chemical Engineering, Sun Yat-sen University, Guangzhou, Guangdong 510275, China.*

*<sup>†</sup>These authors contributed equally to this work.*

*\* Correspondence should be addressed to:*

*Xintao Shuai*

*Tel.: +86-20-84110365*

*Fax: +86-20-84112245;*

*E-mail: shuaixt@mail.sysu.edu.cn*

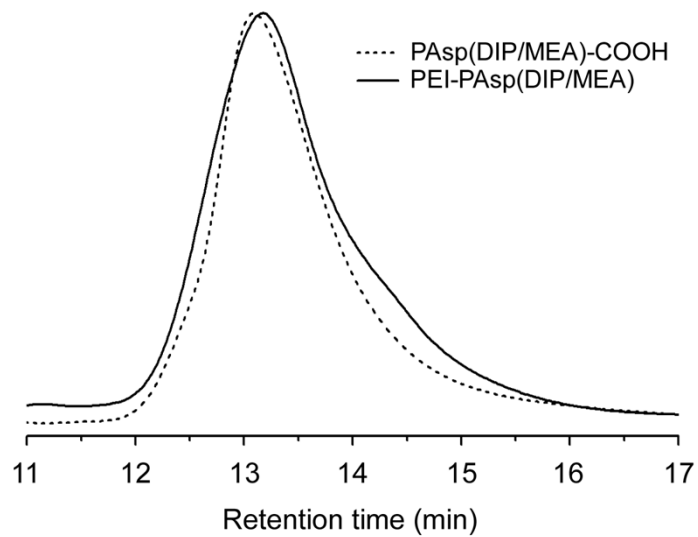

| Name               | $M_{NMR}/kDa$ | $M_n/kDa$ | Polydispersity |
|--------------------|---------------|-----------|----------------|
| PAsp(DIP/MEA)-COOH | 10.9          | 12.2      | 1.47           |
| PEI-PAsp(DIP/MEA)  | 11.5          | 13.3      | 1.49           |

**Fig. S1** GPC curves of PAsp(DIP/MEA)-COOH and PEI-PAsp(DIP/MEA) in DMF containing LiBr (1g/L) at a flow rate of 1.0 mL/min.

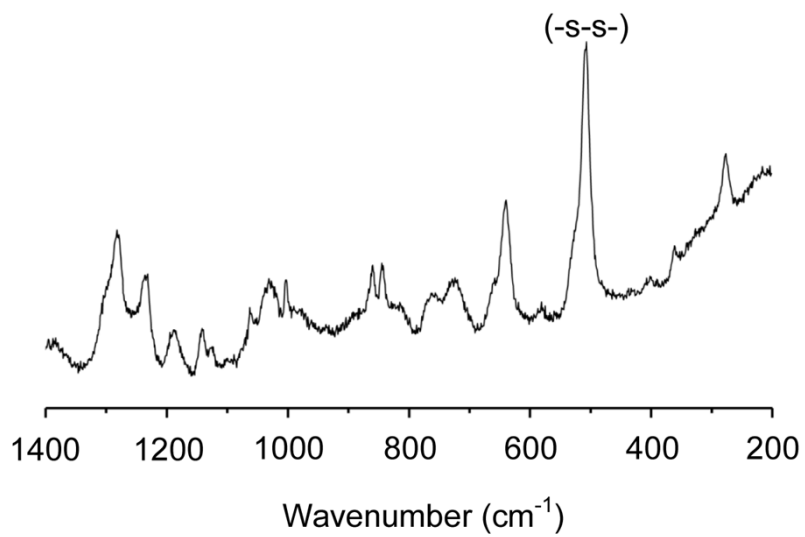

**Fig. S2** Raman spectrum of the vesicle based on PEI-PAsp(DIP/MEA) clearly showing the formation of disulfide bonds.

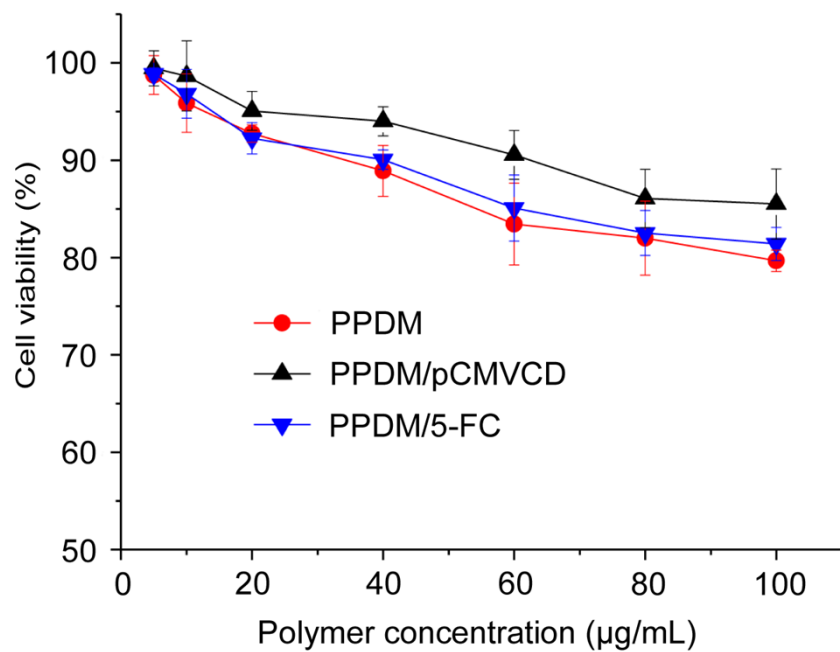

**Fig. S3** Viability of C6 cells in the presence of nanocomplexes encapsulating single therapeutic agent in comparison with empty carrier. Data are presented as mean±SE (n=3).

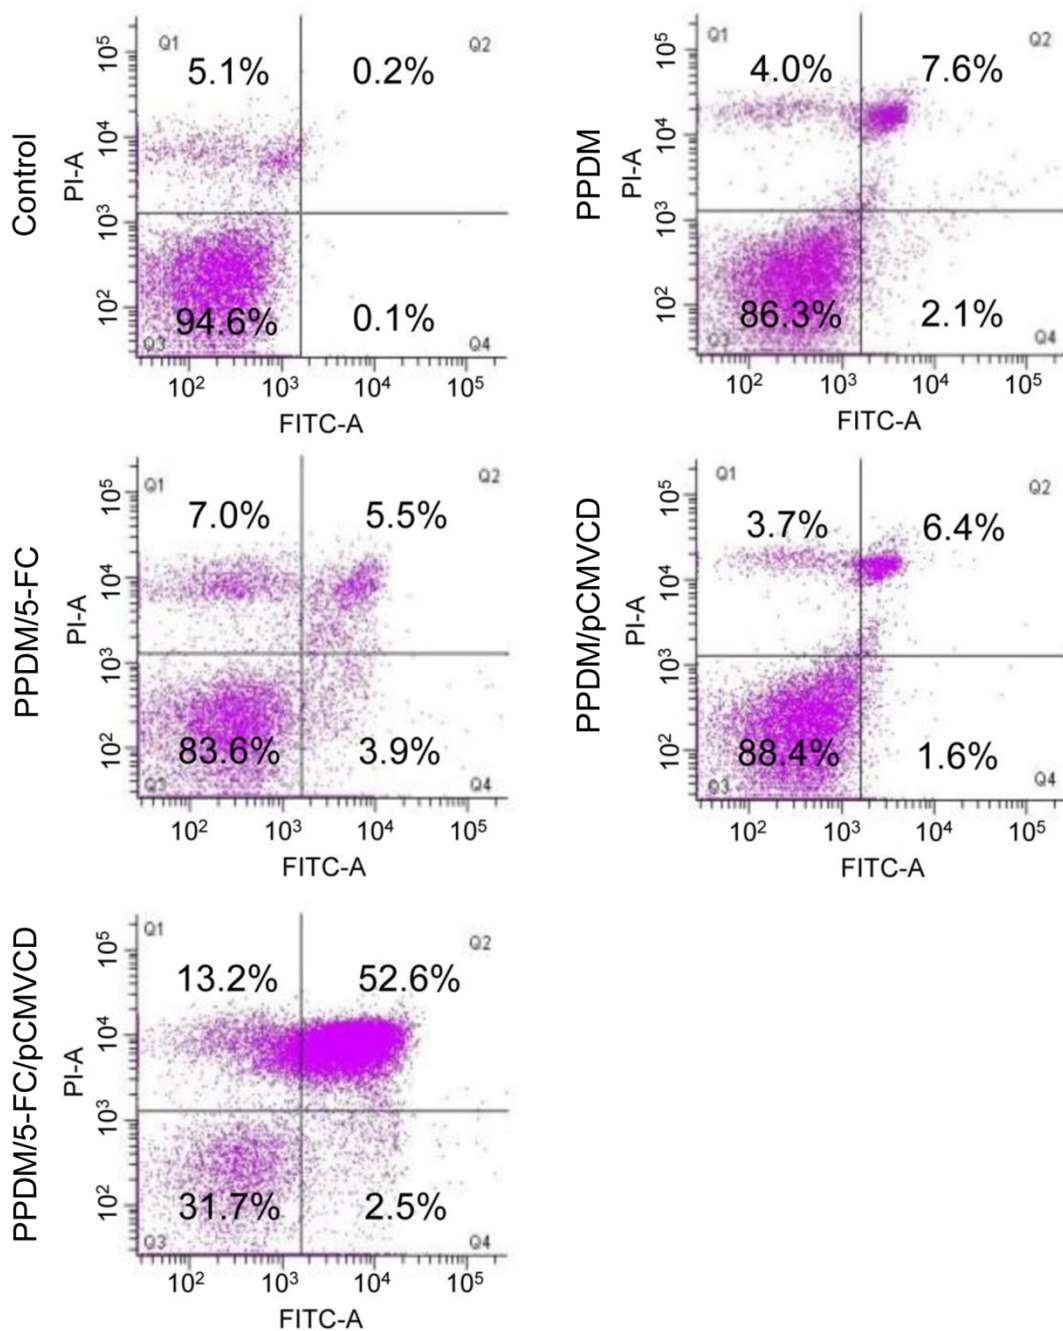

**Fig. S4** The percentage of apoptotic cells quantified by Annexin-V-FITC and PI flow cytometry (Q1: necrotic cells; Q2: late apoptotic cells; Q3: normal viable cells; Q4: early apoptotic cells.). Images show cells incubated with: PPDM, PPDM/5-FC, PPDM/pCMVCD, PPDM/5-FC/pCMVCD, respectively. Data are given as mean  $\pm$  SE (n=3).
